# Supplementary material for: Nonclonal Chromosome Aberrations and Genome Chaos in Somatic and Germ Cells from Patients and Survivors of Hodgkin Lymphoma
Source: PubMed Central journal article supplement (PMC6357137; doi:10.3390/genes10010037), 2019-01-10
Supplement: genes-10-00037-s001.pdf [file genes-10-00037-s001.pdf]

Table S1. Recently used chemotherapy pediatric intermediate in high-risk Hodgkin lymphoma.

| Scheme      | Compounds                                                                                   | Study                                                               | Risk group                                                                            | Rx                                                   | Radiation (Gy)                                                                        |
|-------------|---------------------------------------------------------------------------------------------|---------------------------------------------------------------------|---------------------------------------------------------------------------------------|------------------------------------------------------|---------------------------------------------------------------------------------------|
| VBVP        | Vinblastine,<br>Bleomycin,<br>Etoposide,<br>Prednisone                                      | French Society<br>of Pediatric<br>Oncology<br>(MDH-90)              | IA, IB, IIA, IIB                                                                      | VBVP 34<br>(*OPPA 31-2<br>if PR after<br>cycle 4)    | 20-40, IF                                                                             |
| VAMP        | Vinblastine,<br>Doxorubicin,<br>Methotrexate,<br>Prednisone                                 | Stanford, Dana<br>Farber, and<br>St Jude<br>Consortium <sup>9</sup> | A, IB, IIA, IIB<br>no bulk, no E<br><br>IA, IIA, < 3<br>nodal sites,<br>no bulk, no E | VAMP 34<br><br>VAMP 34                               | 15-22.5, IF<br><br>CR after 2<br>cycles:<br>no RT;<br>PR after<br>cycle 2:<br>25.5 IF |
| DBVE        | Doxorubicin,<br>Bleomycin,<br>Vincristine<br>Etoposide                                      | Children's<br>Oncology<br>Group<br>(POG9426)                        | IA, IIA, IIIA<br>(no bulk)                                                            | DBVE 32-4<br>(based on<br>response<br>after cycle 2) | vs none; PR:<br>21,<br>IF 25.5, IF                                                    |
| OEPA        | Vincristine,<br>Etoposide,<br>Prednisone,<br>Doxorubicin                                    | German Society<br>of Pediatric<br>Oncology<br>(GPOH7)               | IA, IB, IIA                                                                           | OEPA<br>(males)                                      | CR after<br>cycle 2: no<br>RT;<br>PR after<br>cycle 2:<br>20-30, IF                   |
| OPPA        | Vincristine,<br>Prednisone,<br>Procarbazine,<br>Doxorubicin                                 |                                                                     |                                                                                       | OPPA<br>(females) 32                                 |                                                                                       |
| ABVE-<br>PC | Doxorubicin,<br>Bleomycin,<br>Vincristine,<br>Etoposide,<br>Prednisone,<br>Cyclophosphamide | Children's<br>Oncology<br>Group<br>(AHOD0031)                       | IB, IA/IIA<br>with bulk,<br>IIB, IIIA, IVA                                            | ABVE-PC 34                                           | RER, CR:<br>None                                                                      |
| DECA        | Dexamethasone,<br>Etoposide,<br>Cisplatin,<br>Cytarabine                                    |                                                                     |                                                                                       | SER: 6<br>DECA 32                                    | RER,<br>CR: 21, IF<br>SER: 21, IF                                                     |

\*Adverse features: hilar disease, bulk,  $\geq 4$  nodal regions, mediastinal bulk. IF, Involved fields. CR, complete response. PR, partial response. RER, rapid early responder. SER, slow early responder. Modified from Kelly, 2015 [1].

Table S2. Targeted drugs and several monoclonal antibodies for Hodgkin lymphoma.

| Drug Type |                               | Drug name                     | HL Phase | Study                                                            |
|-----------|-------------------------------|-------------------------------|----------|------------------------------------------------------------------|
| Antibody  | Anti-CD30 monoclonal          | Brentuximab vedotin           | I-III    | Younes A. et al., 2010 [2]<br>Younes A. et al., 2012 [3]         |
|           | Anti-CD16/CD30 bispecific     | AFM13                         | I        | Affimed Therapeutics AG., 2012 [4]                               |
|           | Anti-CD20 monoclonal antibody | Ofatumumab (ARZERRA)          | II       | Grupo Español De Linfomas Y Transplante De Médula Ósea. 2010 [5] |
| Molecules | Immunomodulatory drug         | Lenalidomide (Revlimid)       | II       | Böll, B., et al., 2010 [6]                                       |
|           | HDAC inhibitor                | Resminostat (4SC-201)         | I        | 4SC AG., 2012 [7]                                                |
|           | HDAC inhibitor                | 4SC-202                       | I        | 4SC AG., 2012 [8]                                                |
|           | mTOR inhibitor                | Everolimus (RAD001; Afinitor) | II       | Johnston, P.B. <i>et al.</i> , 2010 [9]                          |

Modified from Küppers *et al.* 2012 [10]

Table S3. Complexity and types of rearrangements according with the number of co-occurring DSBs

| Number of DSBs | Location of the DSBs                                     | Possible Rearrangements                                                                                                |
|----------------|----------------------------------------------------------|------------------------------------------------------------------------------------------------------------------------|
| 2              | DSBs occurs in the same arm of the same chromosome       | a) Deletion + ring or + acentric fragment<br>b) Paracentric inversion                                                  |
|                | DSBs occurs in the different arms of the same chromosome | c) Ring with deletion + acentric fragment<br>d) Pericentric inversion                                                  |
|                | DSBs occur in the same arm of two homologous chromosomes | e) Translocation, interstitial duplications and deletions<br>f) Dicentric chromosome with deletion + acentric fragment |
|                | DSBs occur on different, nonhomologous chromosomes       | g) Balanced translocation<br>h) Dicentric chromosome + acentric fragment                                               |
| 3              | All the anterior with two DSBs (a-h)                     | i) All the anterior with two DSBs (a-h) + one deletion or + one inversion                                              |
|                | DSBs occur on three different non-homologous chromosomes | j) Complex three-way balanced translocation<br>k) Dicentric + deletion + acentric fragment                             |

|               |                                                                       |                                                                                                       |
|---------------|-----------------------------------------------------------------------|-------------------------------------------------------------------------------------------------------|
|               | Two DSBs on the same chromosome and one DSB on a different chromosome | l) Inversion + deletion + acentric fragment<br>m) Interchromosomal insertion                          |
| Multiple DSBs | DSBs occur in the same chromosome                                     | n) Chromotripsy, genomic chaos                                                                        |
|               | DSBs occur in two different chromosomes                               | o) Chromotripsy, genomic chaos                                                                        |
|               | DSBs occur in multiple different chromosomes                          | p) Chromoplexy, complex chromosome rearrangements, multiple deletions and duplications, genomic chaos |

## References

1. Kelly, K.M. Hodgkin lymphoma in children and adolescents: Improving the therapeutic index. *Blood* **2015**, *126*, 2452–2458.
2. Younes, A.; Bartlett, N.L.; Leonard, J.P.; Kennedy, D.A.; Lynch, C.M.; Sievers, E.L.; Forero-Torres, A. Brentuximab Vedotin (SGN-35) for Relapsed CD30-Positive Lymphomas. *N. Engl. J. Med.* **2010**, *363*, 1812–1821, doi:10.1056/NEJMoa1002965.
3. Younes, A.; Gopal, A.K.; Smith, S.E.; Ansell, S.M.; Rosenblatt, J.D.; Savage, K.J.; Ramchandren, R.; Bartlett, N.L.; Cheson, B.D.; de Vos, S.; et al. Results of a pivotal phase II study of brentuximab vedotin for patients with relapsed or refractory Hodgkin's lymphoma. *J. Clin. Oncol.* **2012**, *30*, 2183–2189, doi:10.1200/JCO.2011.38.0410.
4. Affimed Therapeutics., A. A Study to Assess AFM13 in Patients With Hodgkin Lymphoma. NIH. Clin. 10/1/2010-11/1/2012 2012, Updated 26 June 2011.
5. Grupo Español de Linfomas y Transplante Autólogo de Médula Ósea. Study of Ofatumumab and ESHAP for the Treatment of Hodgkin's Lymphoma.. <https://clinicaltrials.gov/ct2/show/NCT01195766>
6. Böll, B.; Borchmann, P.; Topp, M.S.; Hänel, M.; Reiners, K.S.; Engert, A.; Naumann, R. Lenalidomide in patients with refractory or multiple relapsed Hodgkin lymphoma. *Br. J. Haematol.* **2010**, *148*, 480–482, doi:10.1111/j.1365-2141.2009.07963.x.
7. 4SC AG. Resminostat (4SC-201) in Relapsed or Refractory Hodgkin's Lymphoma (SAPHIRE). NIH Web Site. Available online: <http://clinicaltrials.gov/ct2/show/NCT01037478>.
8. 4SC AG. Oral Histone Deacetylase Inhibitor 4SC-202 in Patients With Advanced Hematologic Malignancies (TOPAS). NIH Web Site. Available online: <http://clinicaltrials.gov/ct2/show/NCT01344707>.
9. Johnston, P.B.; Inwards, D.J.; Colgan, J.P.; Laplant, B.R.; Kabat, B.F.; Habermann, T.M.; Micallef, I.N.; Porrata, L.F.; Ansell, S.M.; Reeder, C.B.; et al. A Phase II trial of the oral mTOR inhibitor everolimus in relapsed Hodgkin lymphoma. *Am. J. Hematol.* **2010**, *85*, 320–324, doi:10.1002/ajh.21664.
10. Küppers, R.; Engert, A.; Hansmann, M.-L. Hodgkin lymphoma. *J. Clin. Investig.* **2012**, *122*, 3439–3447, doi:10.1172/JCI61245.
